# Supplementary material for: Direct growth of porous crystalline NiCo2O4 nanowire arrays on a conductive electrode for high-performance electrocatalytic water oxidation
Source: Royal Society of Chemistry journal article supplement (doi:10.1039/c4ta05315j), 2014-01-01
Supplement: c4ta05315j1.pdf [file c4ta05315j1.pdf]

*Supporting information*

**Direct Growth of Porous Crystalline NiCo<sub>2</sub>O<sub>4</sub> Nanowire Arrays on  
Conductive Electrode for High-Performance Electrocatalytic Water  
Oxidation**

Xingxing Yu, Zijun Sun, Zhiping Yan, Bin Xiang,\* Xiang Liu, and Pingwu Du\*

CAS Key Laboratory of Materials for Energy Conversion, Department of Materials Science and Engineering, and the Collaborative Innovation Center of Chemistry for Energy Materials (*iChEM*), University of Science and Technology of China, Hefei, Anhui Province, 230026, China

\*Corresponding author: [dupingwu@ustc.edu.cn](mailto:dupingwu@ustc.edu.cn), [binxiang@ustc.edu.cn](mailto:binxiang@ustc.edu.cn)

Tel/Fax: 86-551-63606207

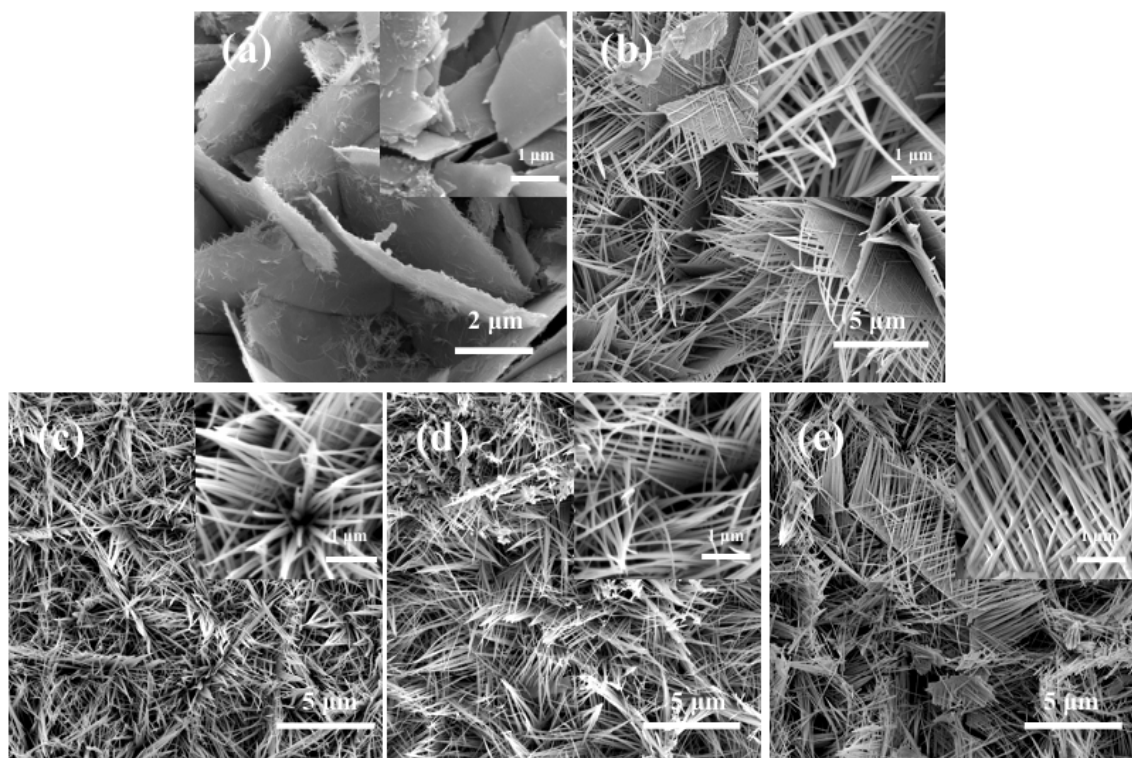

**Figure S1.** SEM images of the  $\text{NiCo}_2\text{O}_4$  after calcinating at  $350\text{ }^\circ\text{C}$  for 2 h in flowing argon with different times of the hydrothermal process at  $120\text{ }^\circ\text{C}$ : (a) 2 h; (b) 4 h; (c) 6 h; (d) 10 h; (e) 15 h.

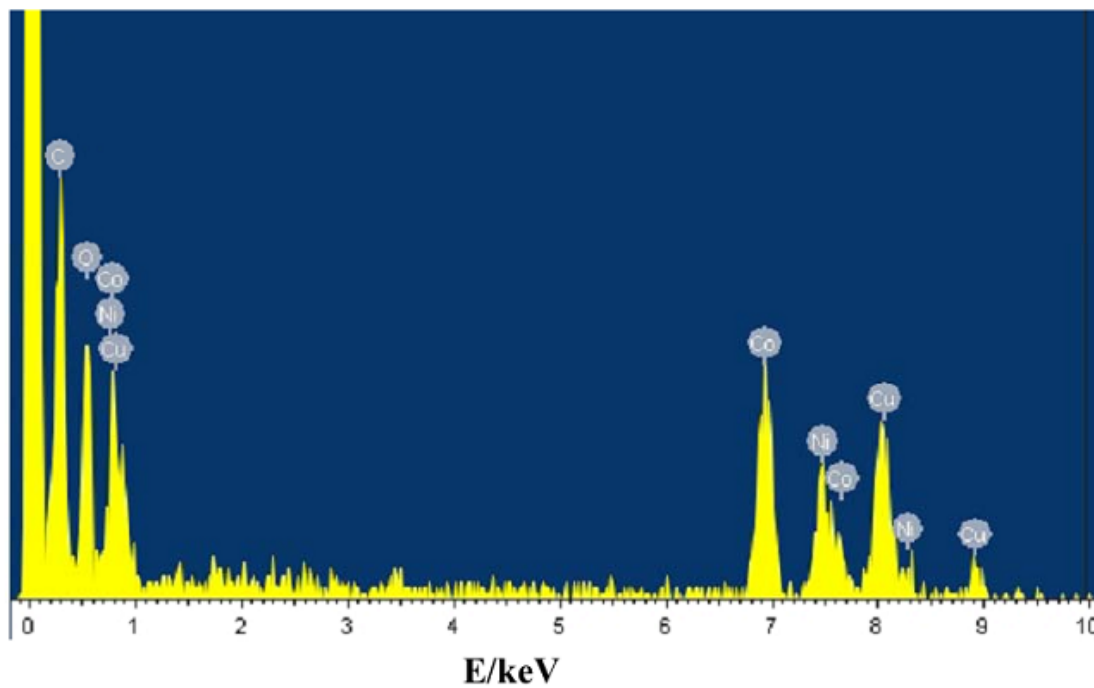

**Figure S2.** Typical EDX patterns of NiCo<sub>2</sub>O<sub>4</sub> nanowires with 10 hours of the hydrothermal process at 120 °C.

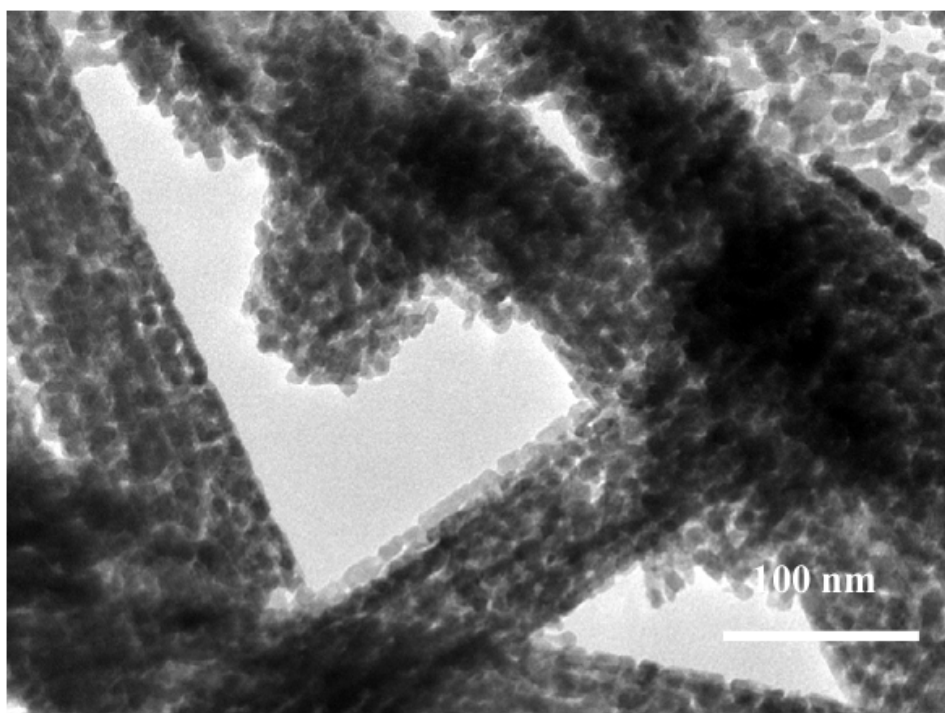

**Figure S3.** TEM image of  $\text{NiCo}_2\text{O}_4$  nanowires with 10 hours of the hydrothermal process at  $120\text{ }^\circ\text{C}$ .

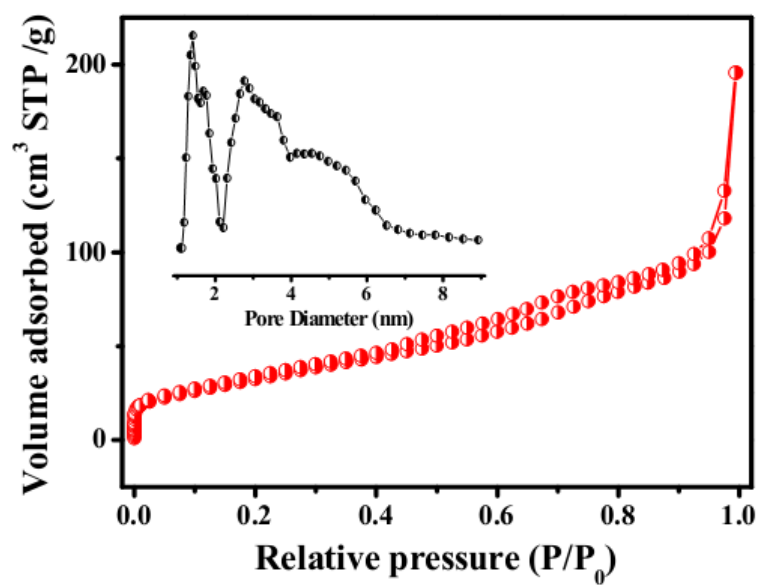

**Figure S4.** The corresponding nitrogen adsorption-desorption isotherm for the NiCo<sub>2</sub>O<sub>4</sub> nanowires in BET measurements and pore-size distribution curves (inset).

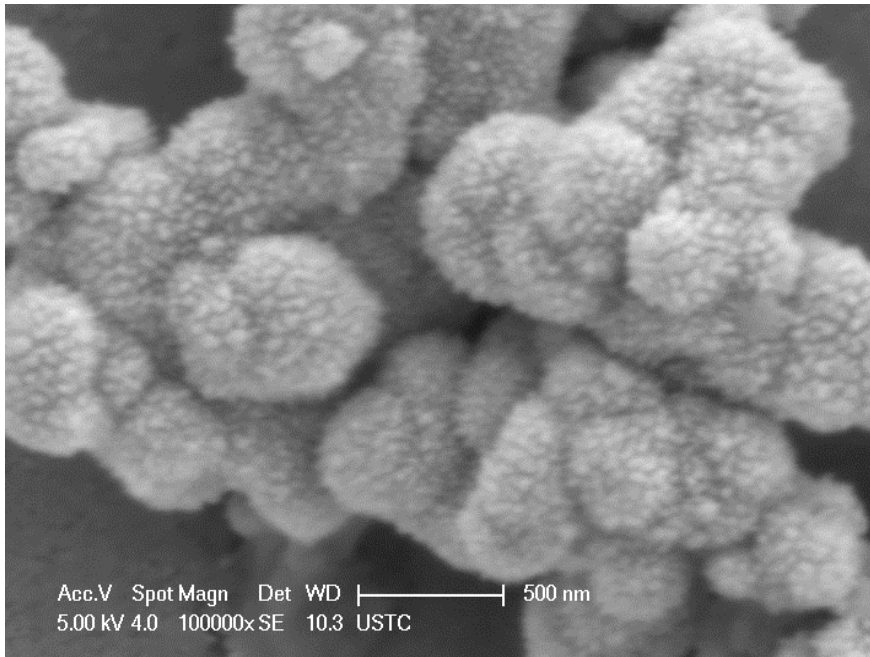

**Figure S5.** SEM image of the naosized IrO<sub>2</sub> catalyst.

**Table S1.** Comparison of different mixed transition-metal oxides for water oxidation reaction activity.

| <b>Materials</b>                                                    | <b>Onset Potential<br/>(V vs. RHE)</b> | <b>reference</b>              |
|---------------------------------------------------------------------|----------------------------------------|-------------------------------|
| Ni <sub>x</sub> Co <sub>3-x</sub> O <sub>4</sub><br>Nanowire Arrays | 1.62                                   | Adv. Mater., 2010,22,1926     |
| Zn <sub>x</sub> Co <sub>3-x</sub> O <sub>4</sub><br>Nanoarrays      | 1.55                                   | Chem. Mater., 2014, 26, 1889  |
| Three-dimensional<br>NiFe-LDH                                       | 1.48                                   | Chem. Commun., 2014, 50, 6479 |
| PNG-NiCo                                                            | 1.54                                   | ACS Nano, 2013,7,10190        |
| NiCo <sub>2</sub> O <sub>4</sub> Nanowire<br>Arrays                 | <b>1.52</b>                            | <b>This work</b>              |
